# Supplementary material for: Potent effect of target structure on microRNA function
Source: Springer Nature journal article supplement (doi:10.1038/nsmb1226), 2007-04-01
Supplement: nsmb1226-S1.pdf [file nsmb1226-S1.pdf]

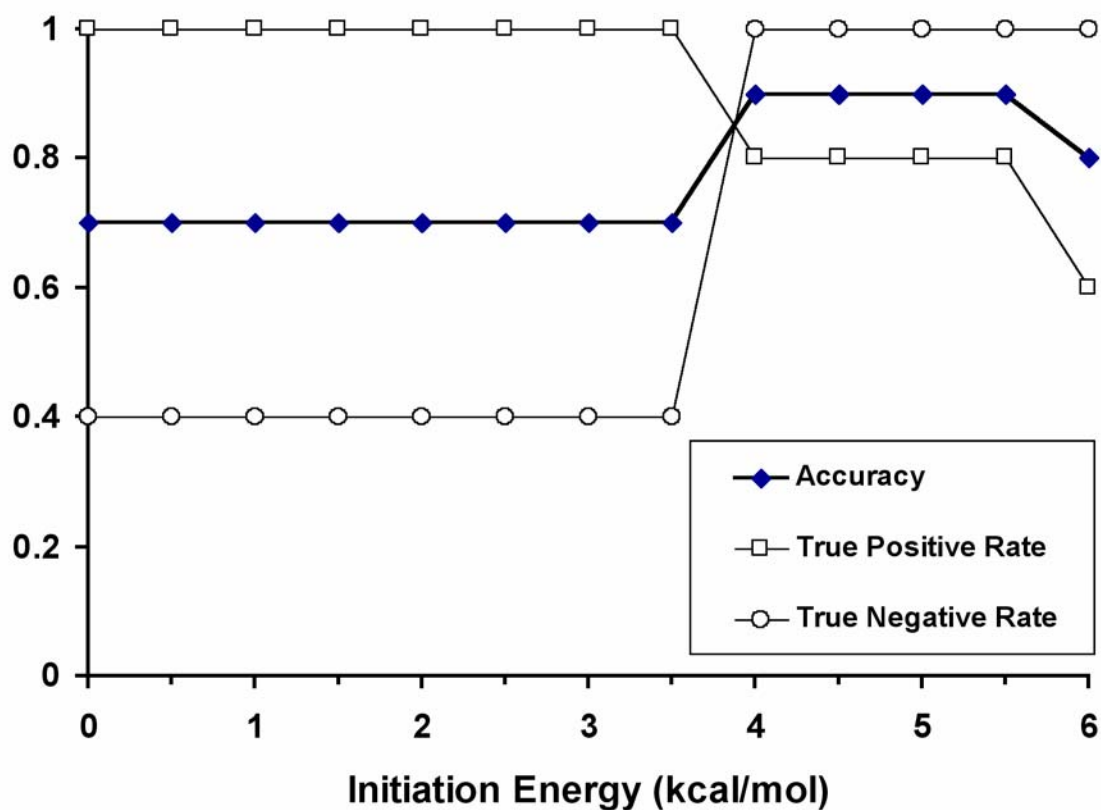

**Supplementary Figure 1:** Performance of prediction for the 10 *lin-41* constructs in Vella et al (2004) by different values of the initiation energy (from 0.0 kcal/mol to 6.0 kcal/mol, in 0.5 kcal/mol increments). True positive rate (sensitivity) is the ratio of the number of true positive predictions to the total number of positive cases from *in-vivo* testing. True negative rate (specificity) is the ratio of the number of true negative predictions to the total number of negative cases by *in-vivo* testing. The overall accuracy of the prediction is the ratio of the total number of true predictions (positive or negative) to the total number of predictions.

### References

Vella, M. C., Choi, E. Y., Lin, S. Y., Reinert, K., and Slack, F. J. (2004). The *C. elegans* microRNA let-7 binds to imperfect let-7 complementary sites from the *lin-41* 3' UTR. *Genes Dev* **18**, 132-137.
