# Supplementary material for: Potent effect of target structure on microRNA function
Source: Springer Nature journal article supplement (doi:10.1038/nsmb1226), 2007-04-01
Supplement: nsmb1226-S2.pdf [file nsmb1226-S2.pdf]

**Supplementary Table 1.** The number of open nucleotides or open blocks in the *let-7* complementary sites of experimentally-tested *lin-41* 3' UTR mutant constructs.

| <b>Mutant construct</b> | <b>Repression sensitivity<sup>a</sup></b> | <b>Number of open nucleotides</b>                    | <b>Number of open 2-nt blocks</b>                   | <b>Number of open 3-nt blocks</b>                  | <b>Number of open 4-nt blocks</b>                 |
|-------------------------|-------------------------------------------|------------------------------------------------------|-----------------------------------------------------|----------------------------------------------------|---------------------------------------------------|
| pMV1                    | ++                                        | 20 (site 5); 8 (site 3);<br>12 (site 1); 14 (site 2) | 18 (site 5); 4 (site 3);<br>9 (site 1); 10 (site 2) | 16 (site 5); 2 (site 3);<br>7 (site 1); 9 (site 2) | 14 (site 5); 0 (site 3)<br>6 (site 1); 7 (site 2) |
| pMV8                    | ++                                        | 11 (site 3); 12 (site 1);<br>13 (site 2)             | 7 (site 3); 9 (site 1);<br>10 (site 2)              | 6 (site 3); 7 (site 1);<br>8 (site 2)              | 1 (site 3); 6 (site 1)<br>7 (site 2)              |
| pMV9                    | +++                                       | 11 (site 1); 13 (site 2)                             | 8 (site 1); 10 (site 2)                             | 7 (site 1); 9 (site 2)                             | 6 (site 1); 8 (site 2)                            |
| pMV5                    | +                                         | 8 (site 1); 7 (site 2)                               | 5 (site 1); 4 (site 2)                              | 4 (site 1); 3 (site 2)                             | 3 (site 1); 2 (site 2)                            |
| pMV12                   | +                                         | 10 (site 1); 12 (site 2)                             | 8 (site 1); 9 (site 2)                              | 6 (site 1); 6 (site 2)                             | 4 (site 1); 5 (site 2)                            |
| pMV19                   | -                                         | 8 (site 1); 10 (site 2)                              | 3 (site 1); 4 (site 2)                              | 1 (site 1); 3 (site 2)                             | 0 (site 1); 0 (site 2)                            |
| pMV6                    | -                                         | 6 (site 1)                                           | 2 (site 1)                                          | 1 (site 1)                                         | 0 (site 1)                                        |
| pMV16                   | -                                         | 10 (site 1); 10 (site 1);<br>11 (site 1)             | 8 (site 1); 8 (site 1);<br>9 (site 1)               | 6 (site 1); 7 (site 1);<br>7 (site 1)              | 4 (site 1); 6 (site 1);<br>4 (site 1)             |
| pMV7                    | -                                         | 10 (site 1)                                          | 6 (site 1)                                          | 4 (site 1)                                         | 1 (site 1)                                        |
| pMV17                   | -                                         | 15 (site 2); 10 (site 2);<br>5 (site 2)              | 13 (site 2); 8 (site 2);<br>1 (site 2)              | 11 (site 2); 7 (site 2);<br>0 (site 2)             | 6 (site 2); 6 (site 2);<br>0 (site 2)             |

<sup>a</sup>Repression sensitivity as reported in Figure 1 of Vella et al. (2004)

## References

Vella, M. C., Choi, E. Y., Lin, S. Y., Reinert, K., and Slack, F. J. (2004). The *C. elegans* microRNA *let-7* binds to imperfect *let-7* complementary sites from the *lin-41* 3' UTR. *Genes Dev* **18**, 132-137.
