# Supplementary material for: Potent effect of target structure on microRNA function
Source: Springer Nature journal article supplement (doi:10.1038/nsmb1226), 2007-04-01
Supplement: nsmb1226-S3.pdf [file nsmb1226-S3.pdf]

**Supplementary Table 2.** miRNA:target interaction energy computed by  $\sum\Delta G_{\text{total}}$  and predicted functional interaction <sup>a</sup> for which experimental tests have been published <sup>b</sup>

| Organism & references <sup>c</sup> | miRNA          | Target               | Experimental evidence | $\sum\Delta G_{\text{total}}$ (kcal/ mol) | Predicted functional interaction | Average $\sum\Delta G_{\text{total}}$ of randomers (kcal/mol) |
|------------------------------------|----------------|----------------------|-----------------------|-------------------------------------------|----------------------------------|---------------------------------------------------------------|
| Ce <sup>1,2</sup>                  | <i>let-7</i>   | hbl-1                | +                     | -191.69                                   | +                                | -6.185                                                        |
| Ce <sup>3</sup>                    | <i>let-7</i>   | lin-41               | +                     | -83.65                                    | +                                | -5.390                                                        |
| Ce <sup>4</sup>                    | <i>let-7</i>   | daf-12               | +                     | -157.42                                   | +                                | -3.368                                                        |
| Ce <sup>4</sup>                    | <i>let-7</i>   | pha-4                | +                     | -24.72                                    | +                                | -0.071                                                        |
| Ce <sup>5,6</sup>                  | <i>lin-4</i>   | lin-14               | +                     | -41.44                                    | +                                | -1.069                                                        |
| Ce <sup>7</sup>                    | <i>lin-4</i>   | lin-28               | +                     | -12.72                                    | +                                | -0.187                                                        |
| Ce <sup>8,9</sup>                  | <i>lsy-6</i>   | cog-1                | +                     | -38.89                                    | +                                | -0.077                                                        |
| Ce <sup>10</sup>                   | <i>miR-84</i>  | let-60               | +                     | -84.02                                    | +                                | -1.506                                                        |
| Ce <sup>11</sup>                   | <i>miR-273</i> | die-1                | +                     | -11.23                                    | +                                | -0.158                                                        |
| Dm <sup>12</sup>                   | <i>bantam</i>  | Hid                  | +                     | -38.43                                    | +                                | -0.212                                                        |
| Dm <sup>13</sup>                   | <i>miR-9a</i>  | sens                 | +                     | -16.49                                    | +                                | -1.184                                                        |
| Ce <sup>14</sup>                   | <i>let-7</i>   | T14B1.1 <sup>d</sup> | +                     | -119.88                                   | +                                | -3.535                                                        |
| Ce <sup>14</sup>                   | <i>let-7</i>   | uba-1                | +                     | -28.04                                    | +                                | -0.014                                                        |
| Ce <sup>14</sup>                   | <i>let-7</i>   | C35E7.4 <sup>d</sup> | +                     | -14.73                                    | +                                | -1.167                                                        |
| Ce <sup>14</sup>                   | <i>let-7</i>   | unc-129 <sup>d</sup> | +                     | -28.06                                    | +                                | -1.348                                                        |
| Ce <sup>14</sup>                   | <i>let-7</i>   | nhr-4 <sup>d</sup>   | +                     | 0.00                                      | -                                | -1.010                                                        |
| Ce <sup>14</sup>                   | <i>let-7</i>   | F29G9.4              | +                     | -17.84                                    | +                                | -1.811                                                        |
| Ce <sup>14</sup>                   | <i>let-7</i>   | C27D6.4              | +                     | -33.88                                    | +                                | -1.040                                                        |
| Ce <sup>14</sup>                   | <i>let-7</i>   | C48A7.2              | +                     | 0.00                                      | -                                | -0.143                                                        |
| Ce <sup>14</sup>                   | <i>let-7</i>   | K08F8.1              | +                     | -38.85                                    | +                                | -0.843                                                        |
| Ce <sup>14</sup>                   | <i>let-7</i>   | K07A6.2              | +                     | NA <sup>e</sup>                           |                                  |                                                               |
| Ce <sup>14</sup>                   | <i>let-7</i>   | ceh-16 <sup>d</sup>  | +                     | -39.16                                    | +                                | -0.077                                                        |
| Ce <sup>14</sup>                   | <i>let-7</i>   | oig-2 <sup>d</sup>   | +                     | 0.00                                      | -                                | -0.214                                                        |
| Ce <sup>15,16</sup>                | <i>miR-48</i>  | hbl-1                | +                     | -161.00                                   | +                                | -6.184                                                        |
| Ce <sup>15</sup>                   | <i>miR-84</i>  | hbl-1                | +                     | -115.52                                   | +                                | -5.541                                                        |
| Ce <sup>15</sup>                   | <i>miR-241</i> | hbl-1                | +                     | -266.45                                   | +                                | -4.177                                                        |
| Ce <sup>17</sup>                   | <i>let-7</i>   | nhr-23               | +                     | -38.84                                    | +                                | -0.858                                                        |
| Ce <sup>17</sup>                   | <i>let-7</i>   | nhr-25               | +                     | -23.66                                    | +                                | -0.472                                                        |
| Ce <sup>17</sup>                   | <i>miR-84</i>  | nhr-23               | +                     | -25.30                                    | +                                | -0.013                                                        |
| Ce <sup>17</sup>                   | <i>miR-84</i>  | nhr-25               | +                     | -46.18                                    | +                                | -0.754                                                        |
| Dm <sup>18</sup>                   | <i>miR-7</i>   | Bearded              | +                     | -23.29                                    | +                                | -1.609                                                        |
| Dm <sup>18</sup>                   | <i>miR-7</i>   | E(spl)m5             | +                     | -69.92                                    | +                                | -2.901                                                        |
| Dm <sup>18</sup>                   | <i>miR-4</i>   | Bearded              | +                     | -14.38                                    | +                                | -1.609                                                        |
| Dm <sup>18</sup>                   | <i>miR-79</i>  | Bearded              | +                     | -17.47                                    | +                                | -1.613                                                        |
| Dm <sup>18</sup>                   | <i>miR-7</i>   | E(spl)m $\gamma$     | +                     | -0.85                                     | -                                | -0.062                                                        |
| Dm <sup>18</sup>                   | <i>miR-7</i>   | Tom                  | +                     | -17.84                                    | +                                | -0.912                                                        |
| Dm <sup>18</sup>                   | <i>miR-7</i>   | Bob                  | +                     | NA <sup>e</sup>                           |                                  |                                                               |
| Dm <sup>19</sup>                   | <i>miR-7</i>   | Hairy                | +                     | -27.87                                    | +                                | -2.277                                                        |
| Dm <sup>18</sup>                   | <i>miR-7</i>   | Cut                  | +                     | -13.09                                    | +                                | -1.493                                                        |
| Dm <sup>18</sup>                   | <i>miR-7</i>   | Wingless             | +                     | -1.25                                     | -                                | -3.65                                                         |
| Dm <sup>18</sup>                   | <i>miR-4</i>   | Tom                  | +                     | 0.00                                      | -                                | -0.912                                                        |
| Dm <sup>18</sup>                   | <i>miR-4</i>   | E(spl)m $\delta$     | +                     | 0.00                                      | -                                | -2.258                                                        |
| Dm <sup>18</sup>                   | <i>miR-4</i>   | E(spl)m $\gamma$     | +                     | 0.00                                      | -                                | -0.062                                                        |

**Supplementary Table 2 (continued)**

| Organism & references <sup>c</sup> | miRNA         | Target           | Experimental evidence | $\sum\Delta G_{\text{total}}$ (kcal/mol) | Predicted functional interaction | Average $\sum\Delta G_{\text{total}}$ of randomers (kcal/mol) |
|------------------------------------|---------------|------------------|-----------------------|------------------------------------------|----------------------------------|---------------------------------------------------------------|
| Dm <sup>18</sup>                   | <i>miR-4</i>  | E(spl)m $\alpha$ | +                     | NA <sup>e</sup>                          |                                  |                                                               |
| Dm <sup>18</sup>                   | <i>miR-4</i>  | E(spl)m4         | +                     | NA <sup>e</sup>                          |                                  |                                                               |
| Dm <sup>18</sup>                   | <i>miR-4</i>  | E(spl)m5         | +                     | -13.00                                   | +                                | -2.901                                                        |
| Dm <sup>18</sup>                   | <i>miR-79</i> | Tom              | +                     | 0.00                                     | -                                | -0.912                                                        |
| Dm <sup>18</sup>                   | <i>miR-79</i> | E(spl)m $\delta$ | +                     | -10.68                                   | +                                | -2.258                                                        |
| Dm <sup>18</sup>                   | <i>miR-79</i> | E(spl)m $\gamma$ | +                     | 0.00                                     | -                                | -0.062                                                        |
| Dm <sup>18</sup>                   | <i>miR-79</i> | E(spl)m $\alpha$ | +                     | NA <sup>e</sup>                          |                                  |                                                               |
| Dm <sup>18</sup>                   | <i>miR-79</i> | E(spl)m4         | +                     | NA <sup>e</sup>                          |                                  |                                                               |
| Dm <sup>18</sup>                   | <i>miR-79</i> | E(spl)m5         | +                     | 0.00                                     | -                                | -2.877                                                        |
| Dm <sup>19</sup>                   | <i>miR-2b</i> | grim             | +                     | -2.06                                    | -                                | -2.373                                                        |
| Dm <sup>19</sup>                   | <i>miR-2a</i> | reaper           | +                     | -16.81                                   | +                                | -1.810                                                        |
| Dm <sup>19</sup>                   | <i>miR-2b</i> | sickle           | +                     | -20.04                                   | +                                | -1.671                                                        |
| Dm <sup>18</sup>                   | <i>miR-7</i>  | E(spl)m3         | +                     | -21.77                                   | +                                | -1.611                                                        |
| Ce <sup>9</sup>                    | <i>lsy-6</i>  | ZK637.13         | -                     | -13.86                                   | +                                | -2.124                                                        |
| Ce <sup>9</sup>                    | <i>lsy-6</i>  | C02B8.4          | -                     | -4.22                                    | -                                | -0.081                                                        |
| Ce <sup>9</sup>                    | <i>lsy-6</i>  | F55G1.1          | -                     | 0.00                                     | -                                | -0.001                                                        |
| Ce <sup>9</sup>                    | <i>lsy-6</i>  | C48D5.2a         | -                     | -0.04                                    | -                                | -1.833                                                        |
| Ce <sup>9</sup>                    | <i>lsy-6</i>  | F59A6.1          | -                     | -2.72                                    | -                                | -4.541                                                        |
| Ce <sup>9</sup>                    | <i>lsy-6</i>  | F40H3.4          | -                     | 0.00                                     | -                                | -0.042                                                        |
| Ce <sup>9</sup>                    | <i>lsy-6</i>  | T05C12.8         | -                     | 0.00                                     | -                                | -0.001                                                        |
| Ce <sup>9</sup>                    | <i>lsy-6</i>  | C27H6.3          | -                     | -0.06                                    | -                                | -0.530                                                        |
| Ce <sup>9</sup>                    | <i>lsy-6</i>  | T23E1.1          | -                     | 0.00                                     | -                                | -0.110                                                        |
| Ce <sup>9</sup>                    | <i>lsy-6</i>  | T14G12.2         | -                     | 0.00                                     | -                                | -0.001                                                        |
| Ce <sup>9</sup>                    | <i>lsy-6</i>  | T20G5.9          | -                     | 0.00                                     | -                                | -0.085                                                        |
| Ce <sup>9</sup>                    | <i>lsy-6</i>  | R07E3.5          | -                     | 0.00                                     | -                                | -0.027                                                        |

<sup>a</sup> An interaction is predicted to be functional (“+”) if for nucleation potential threshold of 4.09 kcal/mol, the sum of  $\Delta G_{\text{total}} < -10$  kcal/mol; otherwise, the interaction is non-functional (“-”);

<sup>b</sup> Positive interactions confirmed by conventional genetic epistasis are in shaded part of the table;

<sup>c</sup> Ce: *C. elegans*; Dm: *D. melanogaster*;

<sup>d</sup> Conflicting experimental evidence presented in the reference;

<sup>e</sup> 3’ UTR sequence is not available from the WormBase Release 1.44 (<http://www.wormbase.org>), or from the FlyBase Release 4.3 (<http://www.flybase.org>).

<sup>1</sup>Abrahante et al, 2003; <sup>2</sup>Lin et al, 2003; <sup>3</sup>Slack et al, 2000; <sup>4</sup>Grosshans et al, 2005; <sup>5</sup>Lee et al, 1993;

<sup>6</sup>Wightman et al, 1993; <sup>7</sup>Moss et al, 1997; <sup>8</sup>Johnston and Hobert,2003; <sup>9</sup>Didiano and Hobert, 2006; <sup>10</sup>Johnson et al, 2005; <sup>11</sup>Chang et al, 2004; <sup>12</sup>Brennecke et al, 2003; <sup>13</sup>Li et al, 2006; <sup>14</sup>Lall et al, 2006; <sup>15</sup>Abbott et al, 2005; <sup>16</sup>Li et al, 2005; <sup>17</sup>Hayes et al, 2006; <sup>18</sup>Lai et al, 2005; <sup>19</sup>Stark et al, 2003.

## References

1. Abrahante, J.E. et al. The Caenorhabditis elegans hunchback-like gene lin-57/hbl-1 controls developmental time and is regulated by microRNAs. *Dev Cell* **4**, 625-37 (2003).
2. Lin, S.Y. et al. The C elegans hunchback homolog, hbl-1, controls temporal patterning and is a probable microRNA target. *Dev Cell* **4**, 639-50 (2003).

3. Slack, F.J. et al. The lin-41 RBCC gene acts in the *C. elegans* heterochronic pathway between the let-7 regulatory RNA and the LIN-29 transcription factor. *Mol Cell* **5**, 659-69 (2000).
4. Grosshans, H., Johnson, T., Reinert, K.L., Gerstein, M. & Slack, F.J. The temporal patterning microRNA let-7 regulates several transcription factors at the larval to adult transition in *C. elegans*. *Dev Cell* **8**, 321-30 (2005).
5. Lee, R.C., Feinbaum, R.L. & Ambros, V. The *C. elegans* heterochronic gene lin-4 encodes small RNAs with antisense complementarity to lin-14. *Cell* **75**, 843-54 (1993).
6. Wightman, B., Ha, I. & Ruvkun, G. Posttranscriptional regulation of the heterochronic gene lin-14 by lin-4 mediates temporal pattern formation in *C. elegans*. *Cell* **75**, 855-62 (1993).
7. Moss, E.G., Lee, R.C. & Ambros, V. The cold shock domain protein LIN-28 controls developmental timing in *C. elegans* and is regulated by the lin-4 RNA. *Cell* **88**, 637-46 (1997).
8. Johnston, R.J. & Hobert, O. A microRNA controlling left/right neuronal asymmetry in *Caenorhabditis elegans*. *Nature* **426**, 845-9 (2003).
9. Didiano, D. & Hobert, O. Perfect seed pairing is not a generally reliable predictor for miRNA-target interactions. *Nat Struct Mol Biol* **13**, 849-51 (2006).
10. Johnson, S.M. et al. RAS is regulated by the let-7 microRNA family. *Cell* **120**, 635-47 (2005).
11. Chang, S., Johnston, R.J., Jr., Frokjaer-Jensen, C., Lockery, S. & Hobert, O. MicroRNAs act sequentially and asymmetrically to control chemosensory laterality in the nematode. *Nature* **430**, 785-9 (2004).
12. Brennecke, J., Hipfner, D.R., Stark, A., Russell, R.B. & Cohen, S.M. bantam encodes a developmentally regulated microRNA that controls cell proliferation and regulates the proapoptotic gene hid in *Drosophila*. *Cell* **113**, 25-36 (2003).
13. Li, Y., Wang, F., Lee, J.A. & Gao, F.B. MicroRNA-9a ensures the precise specification of sensory organ precursors in *Drosophila*. *Genes Dev* **20**, 2793-805 (2006).
14. Lall, S. et al. A genome-wide map of conserved microRNA targets in *C. elegans*. *Curr Biol* **16**, 460-71 (2006).
15. Abbott, A.L. et al. The let-7 MicroRNA family members mir-48, mir-84, and mir-241 function together to regulate developmental timing in *Caenorhabditis elegans*. *Dev Cell* **9**, 403-14 (2005).
16. Li, M., Jones-Rhoades, M.W., Lau, N.C., Bartel, D.P. & Rougvie, A.E. Regulatory mutations of mir-48, a *C. elegans* let-7 family MicroRNA, cause developmental timing defects. *Dev Cell* **9**, 415-22 (2005).
17. Hayes, G.D., Frand, A.R. & Ruvkun, G. The mir-84 and let-7 paralogous microRNA genes of *Caenorhabditis elegans* direct the cessation of molting via the conserved nuclear hormone receptors NHR-23 and NHR-25. *Development* **133**, 4631-4641 (2006).
18. Lai, E.C., Tam, B. & Rubin, G.M. Pervasive regulation of *Drosophila* Notch target genes by GY-box-, Brd-box-, and K-box-class microRNAs. *Genes Dev* **19**, 1067-80 (2005).
19. Stark, A., Brennecke, J., Russell, R.B. & Cohen, S.M. Identification of *Drosophila* MicroRNA targets. *PLoS Biol* **1**, E60 (2003).
